# Supplementary material
Source: ML conference proceedings conference paper supplement (https://proceedings.neurips.cc/paper_files/paper/2010/hash/705f2172834666788607efbfca35afb3-Abstract.html)
Supplement: Supplementary file 1 [file 705f2172834666788607efbfca35afb3-Supplemental.zip]

---

# Supplementary Information for "Exact inference and learning in loopy cumulative distribution networks"

---

Jim C. Huang, Nebojsa Jojic and Christopher Meek  
 Microsoft Research  
 One Microsoft Way, Redmond, WA 98052

## 1 Nonparanormal distribution

The nonparanormal distribution  $NPN(\boldsymbol{\mu}, \boldsymbol{\Sigma}, \mathbf{f})$  of [1] consists of a multivariate Gaussian distribution defined on nonlinearly transformed variables  $f_\alpha(x_\alpha)$  such that the joint probability density function is given by

$$p(\mathbf{x}) = \mathcal{N}(\mathbf{f}(\mathbf{x}); \boldsymbol{\mu}, \boldsymbol{\Sigma}) \prod_{\alpha} |f'_\alpha(x_\alpha)| \quad (1)$$

where  $\mathbf{f}$  is the vector whose elements are nonlinear transforms  $f_\alpha(x_\alpha)$ . The nonparanormal distribution corresponds to a Gaussian copula model with monotone and differentiable functions  $f_\alpha(x_\alpha)$ . We specified the functions  $f_\alpha(x_\alpha)$  using the suggested parameterization of [1] whereby we set

$$f_\alpha(x_\alpha) = \tilde{\mu}_\alpha + \tilde{\sigma}_\alpha \Phi^{-1}(\tilde{F}_\alpha(x_\alpha)) \quad (2)$$

where  $\Phi$  is the normal cumulative distribution function,  $\tilde{\mu}_\alpha, \tilde{\sigma}_\alpha$  are the empirical mean and standard deviation for random variable  $X_\alpha$  and  $\tilde{F}_\alpha$  is the Winsorized estimator [1] of the CDF for  $X_\alpha$  given by

$$\tilde{F}_\alpha(x_\alpha) = \begin{cases} \delta_n & \text{if } \hat{F}_\alpha(x_\alpha) < \delta_n \\ \hat{F}_\alpha(x_\alpha) & \text{if } \delta_n \leq \hat{F}_\alpha(x_\alpha) \leq 1 - \delta_n \\ 1 - \delta_n & \text{if } \hat{F}_\alpha(x_\alpha) > 1 - \delta_n \end{cases}$$

for empirical CDF  $\hat{F}_\alpha(x_\alpha)$ . The truncation constant  $\delta_n$  was set according to [1] to the value  $\delta_n = \frac{1}{4n^{1/4}\sqrt{\pi \log n}}$  where  $n$  is the size of the training set.

## 2 Multivariate logistic distribution

The multivariate logistic CDF [2] is given by

$$F(\mathbf{x}|\boldsymbol{\theta}) = \left(1 + \sum_{\alpha} e^{-\frac{x_\alpha - \mu_\alpha}{\sigma_\alpha}}\right)^{-(k+1)} \quad (3)$$

for  $k > 0$  and  $\sigma_\alpha > 0$ . The corresponding PDF is given by

$$P(\mathbf{x}|\boldsymbol{\theta}) = \frac{k! e^{-\sum_{\alpha} \frac{x_\alpha - \mu_\alpha}{\sigma_\alpha}}}{\prod_{\alpha} \sigma_\alpha} F(\mathbf{x}|\boldsymbol{\theta}) \quad (4)$$

We estimated the above model by maximizing likelihood for  $k = 1, \dots, 10$  and selected the value of  $k$  that yielded the best average test likelihood.

## 3 Settings for learning CDN models

The disconnected CDN corresponds to a fully factorized Gumbel distribution

$$F(\mathbf{x}|\boldsymbol{\theta}) = \prod_{\alpha \in V} F(x_\alpha|\mu_\alpha, \sigma_\alpha) = \prod_{\alpha \in V} \exp(-e^{-\frac{x_\alpha - \mu_\alpha}{\sigma_\alpha}}) \quad (5)$$

with  $\sigma_\alpha > 0$ .

For learning the CDN models, we used first-order stochastic gradient descent methods with learning rates  $\nu$  set to 0.05. Means were initialized to small random values and standard deviations were initialized to 1. The coefficient  $\theta_s$  was initialized to 0.99. Parameters were then updated by a stochastic gradients algorithm with 100 epochs, with standard deviations constrained to be at least 0.1 and coefficients  $\theta_s$  were constrained to be between 0.01 and 0.99. The learning rate was set to decay according to the rule  $\nu \leftarrow \nu \frac{m}{m+1}$  for the  $m^{th}$  epoch.

## References

- [1] Liu, H., Lafferty, J. and Wasserman, L. (2009) The nonparanormal: Semiparametric estimation of high dimensional undirected graphs. *Journal of Machine Learning Research (JMLR)* **10**, 2295-2328.
- [2] Malik, H.J. and Abraham, B. (1978) Multivariate logistic distributions. *Annals of Statistics* **1(3)**, 588-590.
